# Supplementary figures and images for: Use of North Carolina Medicaid Collaborative Care Billing Codes After Statewide Approval for Reimbursement
Source: Atypon-hosted journal article supplement (doi:10.1176/appi.ps.202200027), 2022-06-23

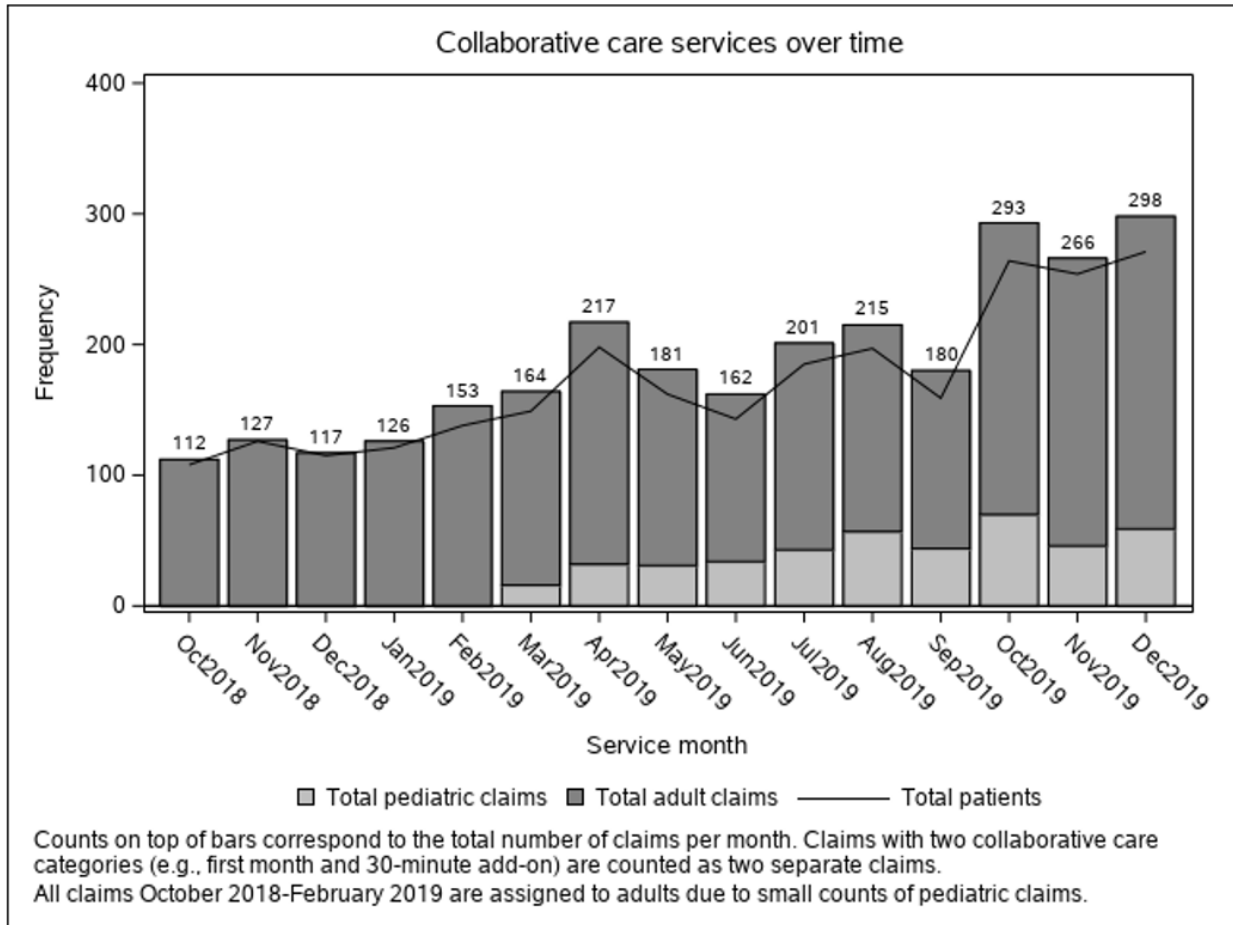

Supplement: appi.ps.202200027.ds001.pdf [file appi.ps.202200027.ds001.pdf]
